# Supplementary material for: Theranostic gold-in-gold cage nanoparticles enable photothermal ablation and photoacoustic imaging in biofilm-associated infection models
Source: PubMed Central journal article supplement (PMC10617778; doi:10.1172/jci168485), 2023-11-01
Supplement: jci-133-168485-s129.pdf [file jci-133-168485-s129.pdf]

# **Theranostic gold-in-gold cage nanoparticles enable photothermal ablation and photoacoustic imaging in biofilm-associated infection models**

Maryam Hajfathalian<sup>1,2\*</sup>, Christiaan R. de Vries<sup>2</sup>, Jessica C. Hsu<sup>1</sup>, Ahmad Amirshaghaghi<sup>3</sup>, Yuxi C. Dong<sup>3</sup>, Zhi Ren<sup>4</sup>, Yuan Liu<sup>4</sup>, Yue Huang<sup>1,4</sup>, Yong Li<sup>4</sup>, Simon Knight<sup>5</sup>, Pallavi Jonnalagadda<sup>3</sup>, Aimen Zlitni<sup>6</sup>, Elizabeth Grice<sup>5</sup>, Paul L. Bollyky<sup>2\*</sup>, Hyun Koo<sup>4</sup>, David. P. Cormode<sup>1,3\*</sup>

<sup>1</sup>Department of Radiology, University of Pennsylvania, 3400 Spruce Street, 1 Silverstein, Philadelphia, Pennsylvania 19104, United States,

<sup>2</sup>Division of Infectious Diseases, School of Medicine, Stanford University, Stanford, CA 94305

<sup>3</sup> Department of Bioengineering, University of Pennsylvania, Philadelphia, Pennsylvania 19104, United States,

<sup>4</sup> Department of Orthodontics and Divisions of Pediatric Dentistry & Community Oral Health, School of Dental Medicine, University of Pennsylvania, Philadelphia, Pennsylvania 19104, United States,

<sup>5</sup>Department of Dermatology and Microbiology, Perelman School of Medicine, University of Pennsylvania, 421 Curie Blvd, BRB 1046/7, Philadelphia, Pennsylvania 19104, United States,

<sup>6</sup>Department of Radiology, School of Medicine, Stanford University, Stanford, CA 94305

\* Corresponding authors: University of Pennsylvania, 3400 Spruce St, 1 Silverstein, Philadelphia, PA 19104, USA, Tel: 215-615-4656, Fax: 215-662-7868

Stanford University, 279 Campus Drive West, Beckman Center, Rm 239, Stanford, CA 94305

**[pbollyky@stanford.edu](mailto:pbollyky@stanford.edu)**

**[david.cormode@penncmedicine.upenn.edu](mailto:david.cormode@penncmedicine.upenn.edu)**

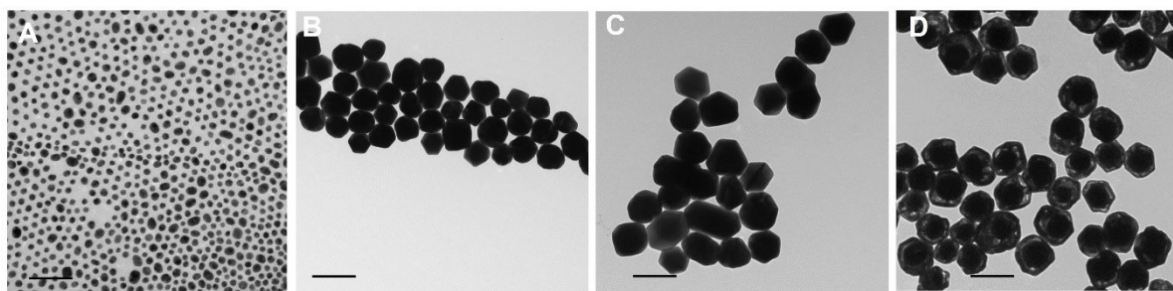

**Figure S1.** TEM of A) Au seeds, B) the 78 nm Au cores, C) Au@Ag core-shell structures, D) Au@Au core-cage structures. The scale bar is 100 nm in each panel.

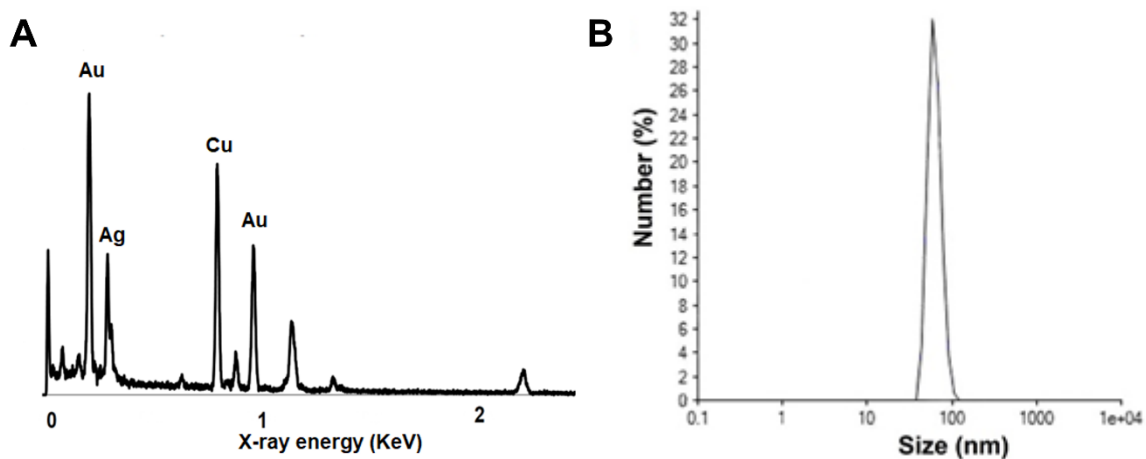

**Figure S2.** Characterization of PTNP structures. A) EDS spectra of PTNP (To measure the EDS spectra, the samples were prepared on TEM grids which are made of copper), and B) Hydrodynamic diameter distribution of PTNP structures.

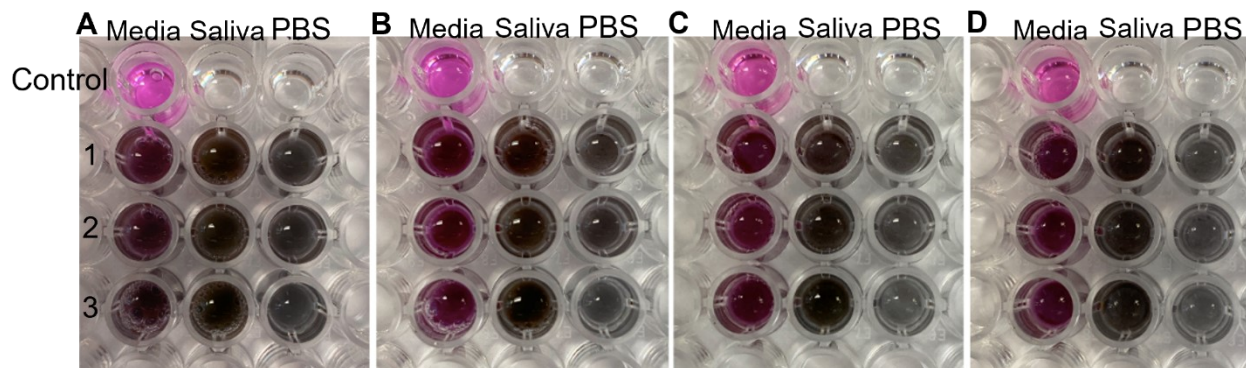

**Figure S3.** PTNP suspended in HaCaT cell media, saliva, and PBS (Rows indicate control (media without PTNP) and PTNP within the solutions with three replicants (1,2, and 3)) for A) 1 day, B) 3 days, C) 8 days, and D) 15 days.

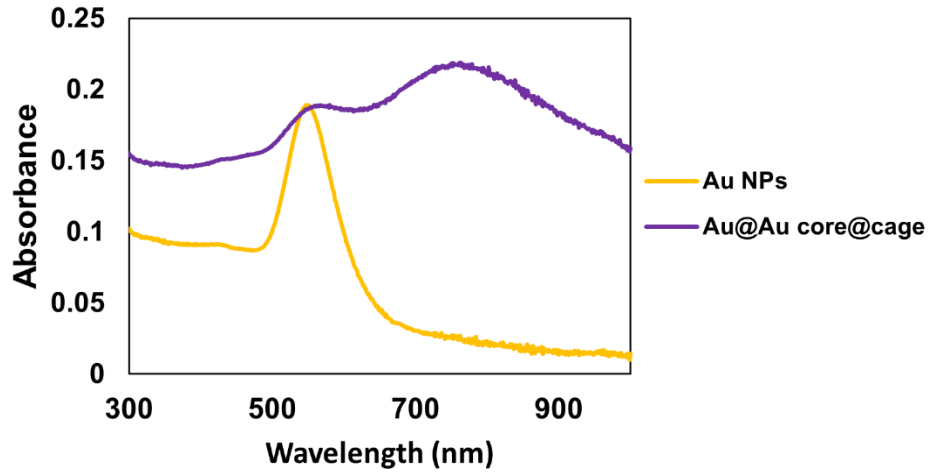

**Figure S4.** UV-vis spectra of AuNPs (78 nm) and Au@Au core@cage nanoparticles (PTNP, 85 nm).

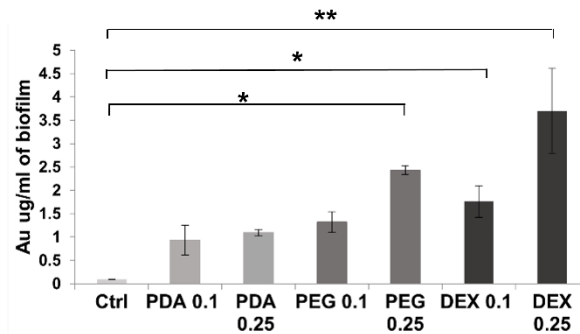

**Figure S5.** The uptake of DEX, PEG and PDA coated PTNP (in different concentration of 0, 0.1, 0.25 mg/ml) into *S. mutans* biofilms formed on sHA. \*P< 0.05, \*\*P<0.005.

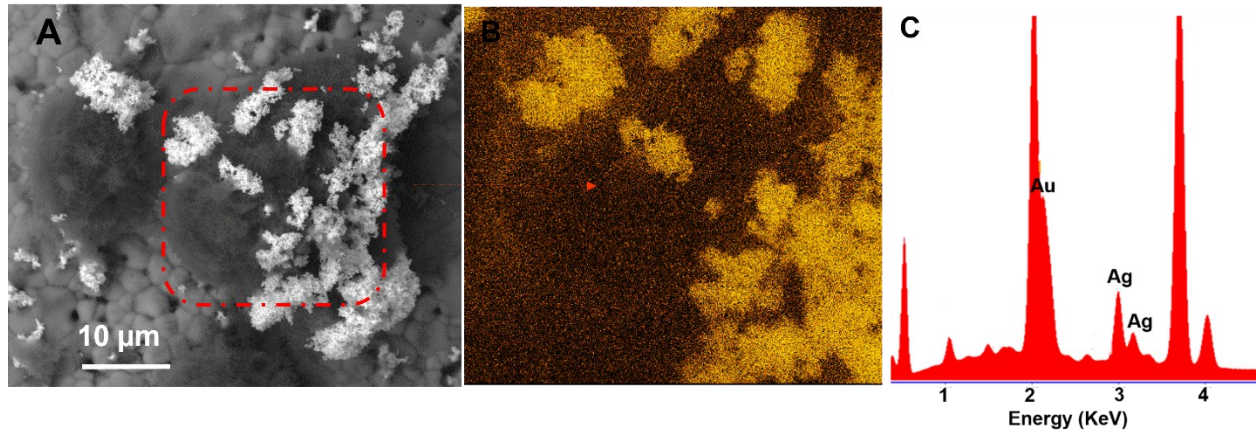

**Figure S6.** PTNP uptake by *s. mutans* bacteria. A) SEM in backscattered electron (BSE) mode showing the morphology of PTNP-treated biofilm. B) BSE/EDS map showing gold (yellow) distribution on biofilms. C) Energy dispersive X-ray spectroscopy (EDS) elemental analysis of PTNP structures.

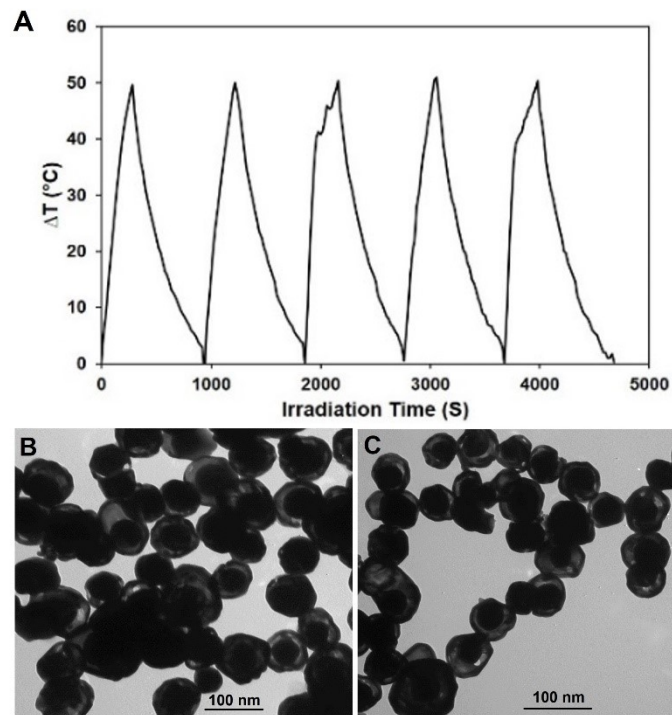

**Figure S7.** Photostability of PTNP. A) Temperature change of PTNP during five laser irradiation cycles (each irradiation time is 5 min). TEM of irradiated PTNP sample B) before, and C) after five cycle laser irradiations.

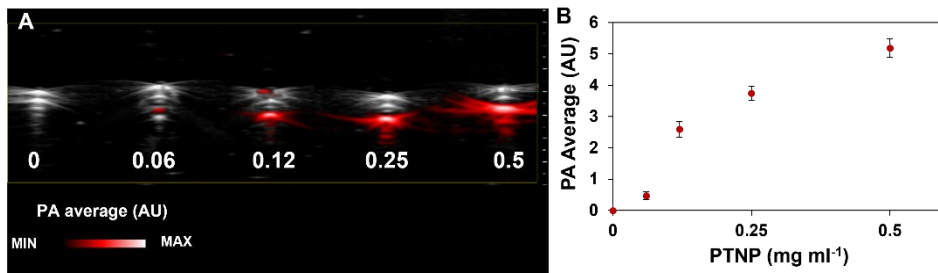

**Figure S8.** In vitro PA imaging of PTNP, A and B) PA contrast enhancement at different concentrations.

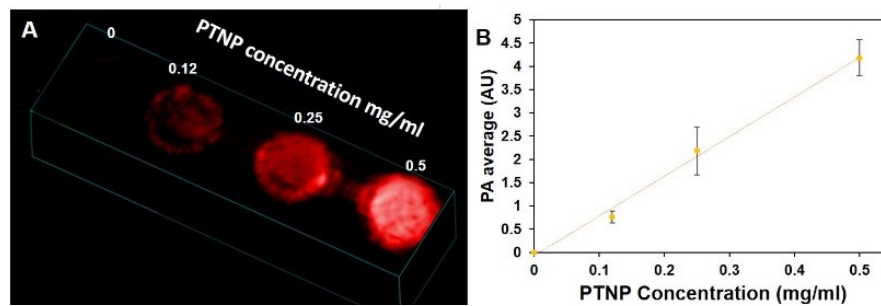

**Figure S9.** In vitro PA imaging of PTNP, A and B) Signal enhancement of PTNP incubated with *S. aureus* biofilm at different concentrations.

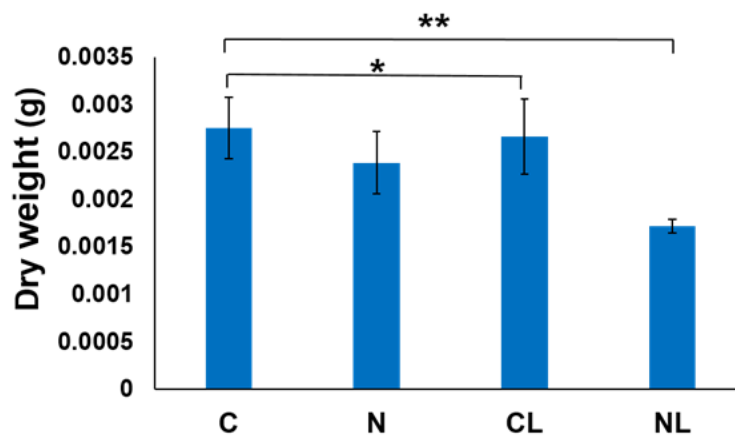

**Figure S10.** Dry weight of biofilms after the treatments. In the graphs C, N, CL, NL denote control, PTNP, control + laser, and PTNP + laser respectively. \* $P < 0.05$ , \*\* $P < 0.0001$ .



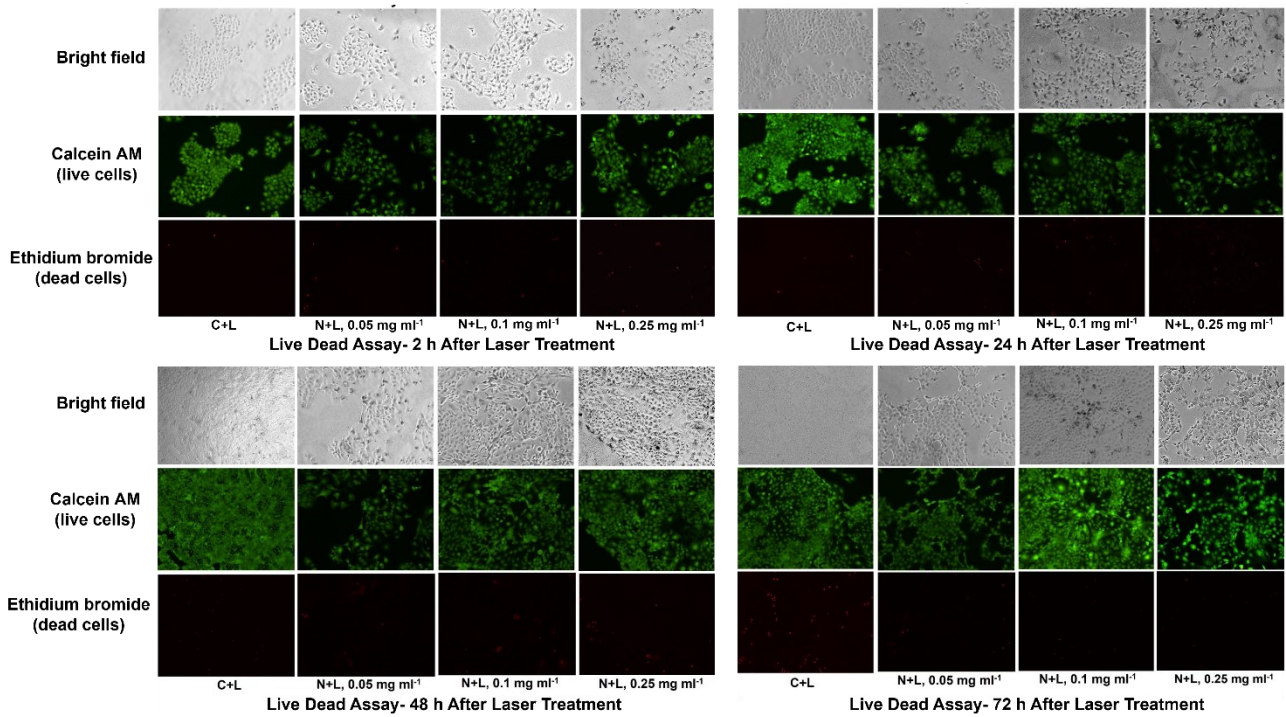

**Figure S11.** Live-Dead staining image of HaCaT cells at 0.5W laser irradiation after 2h, 24h, 48h, and 72h.

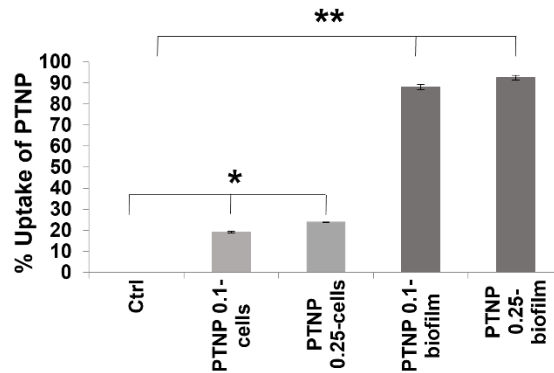

**Figure S12** The uptake of DEX coated PTNP (at concentrations of either 0.1 or 0.25 mg/ml) into *S. mutans* biofilms and epithelial cells. \* $P < 0.05$ , \*\* $P < 0.005$ .

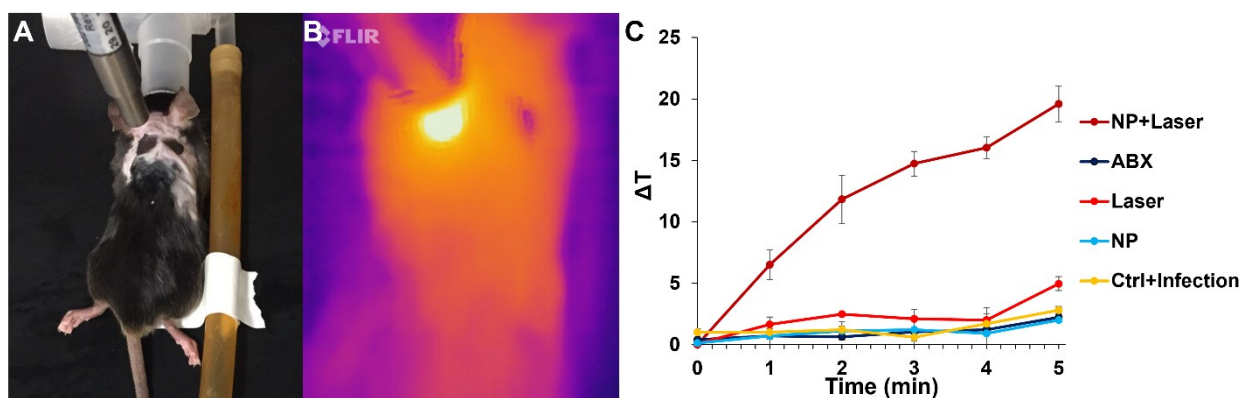

**Figure S13.** Infected wounds were administered PTNP (20  $\mu$ l of 2.5 mg ml<sup>-1</sup>, topical treatment); and ABX. 10 minutes later, infected wounds of mice also received laser irradiation (0.7 W cm<sup>-2</sup>, 5 min). n = 4 mice per group, for a total of five groups. A) A photograph of the procedure. B) Thermographic image of an infected wound and its surroundings during the treatment. C) Image analysis of thermal imaging data during the treatment,  $\Delta T$  shows the difference between wound temperature and animal body temperatures.

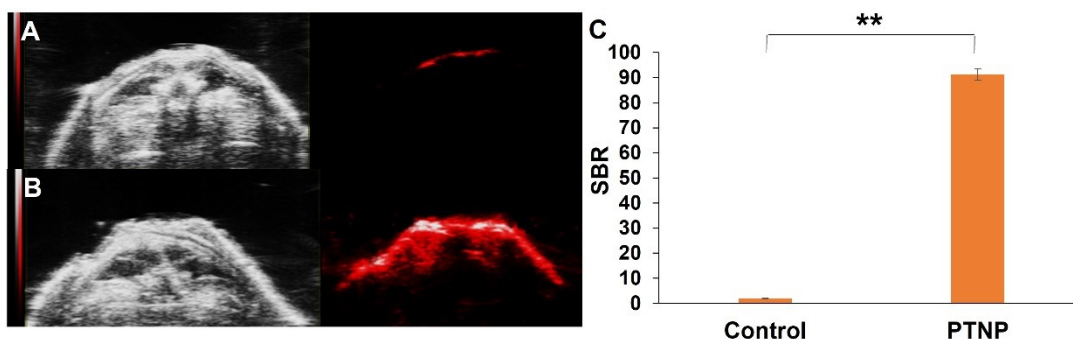

**Figure S14.** In vivo PA imaging of infected wounds. A) Control and B) PTNP treated. Left: greyscale ultrasound images, and right: PA images. C) SBR of the infected wounds with and without incubation with PTNP. \*\* indicate statistically significant differences at P<0001.

### Evaluation of Photothermal Conversion Efficacy

The photothermal conversion efficacy of PTNP was calculated using the following equation:

$$\eta = (hS\Delta T_{\max} - Q_s) / I(1 - 10^{-A^{808}}) \quad (1)$$

$$T_s = mD CD/hS \quad (2)$$

Where  $h$  is the heat transfer coefficient,  $S$  is the surface area of the container,  $T_{\max}$  is the maximum steady temperature of the solution of the PTNP (i.e., 71.2 °C), and environmental temperature ( $T_{\text{Surr}}$ ) was 18 °C.  $I$  is the laser power (2 W),  $A_{808}$  is the absorbance of the PTNP at 808 nm ( $A = 0.17$ ), and  $Q_s$  express heat associated with the light absorption by the solvent. The variable  $T_s$  is the sample-system time constant, and  $mD$  and  $CD$  are the mass (1 g) and heat capacity ( $4.2 \text{ J}\cdot\text{g}^{-1}\cdot\text{°C}^{-1}$ ) of the deionized water used as the solvent. From equations (1) and (2), the  $\eta$  value of the PTNP was calculated to be 77%, which is comparable with gold nanostar (78%)<sup>1</sup>, gold nanoporous nanoshell (75.5%)<sup>2</sup> and higher than gold nanocages (53.6%)<sup>3</sup>, gold nanorings (42%)<sup>4</sup>, gold nanoshells (41.4%)<sup>5</sup>, gold nanorod (21.3%)<sup>6</sup> graphene oxide (25%)<sup>7</sup>, Cys-CuS NPs (38%)<sup>5</sup> Au@ Cu<sub>2-x</sub> S Core@ Shell (52%)<sup>8</sup>.

## References

- 1 Wang, Y., Yang, Y., Yang, L., Lin, Y., Tian, Y., Ni, Q., ... & Lu, G. (2022). Gold Nanostar@ Polyaniline Theranostic Agent with High Photothermal Conversion Efficiency for Photoacoustic Imaging-Guided Anticancer Phototherapy at a Low Dosage. *ACS Applied Materials & Interfaces*, 14(25), 28570-28580.
- 2 Lindley, S. A., & Zhang, J. Z. (2019). Bumpy hollow gold nanospheres for theranostic applications: effect of surface morphology on photothermal conversion efficiency. *ACS Applied Nano Materials*, 2(2), 1072-1081.
- 3 Xie, J., Liang, R., Li, Q., Wang, K., Hussain, M., Dong, L., ... & Tao, J. (2022). Photosensitizer-loaded gold nanocages for immunogenic phototherapy of aggressive melanoma. *Acta Biomaterialia*, 142, 264-273.
- 4 Liu, Y., Wang, Z., Liu, Y., Zhu, G., Jacobson, O., Fu, X., ... & Chen, X. (2017). Suppressing nanoparticle-macrophage system interactions of two-dimensional gold nanorings for improved tumor accumulation and photothermal ablation of tumors. *ACS nano*, 11(10), 10539-10548.
- 5 Kang, S. H., Lee, Y. K., Park, I. S., Park, I. K., Hong, S. M., Kwon, S. Y., ... & Hong, S. J. (2020). Biomimetic gold nanoshell-loaded macrophage for photothermal biomedicine. *BioMed research international*, 2020.
- 6 Liu, X., Li, B., Fu, F., Xu, K., Zou, R., Wang, Q., ... & Hu, J. (2014). Facile synthesis of biocompatible cysteine-coated CuS nanoparticles with high photothermal conversion efficiency for cancer therapy. *Dalton Transactions*, 43(30), 11709-11715.
- 7 Meng, D., Yang, S., Guo, L., Li, G., Ge, J., Huang, Y., ... & Geng, J. (2014). The enhanced photothermal effect of graphene/conjugated polymer composites: photoinduced energy transfer and applications in photocontrolled switches. *Chemical Communications*, 50(92), 14345-14348.
- 8 Zhu, H., Wang, Y., Chen, C., Ma, M., Zeng, J., Li, S., ... & Gao, M. (2017). Monodisperse dual plasmonic Au@ Cu<sub>2-x</sub> E (E= S, Se) core@ shell supraparticles: aqueous fabrication, multimodal imaging, and tumor therapy at in vivo level. *ACS nano*, 11(8), 8273-8281.
